# 1 **Genomic evaluation of *Bordetella* spp. originating from Australia**

2 Winkie Fong<sup>1,3,4</sup>, Verlaine Timms<sup>1,3</sup>, Eby Sim<sup>1,2</sup>, and Vitali Sintchenko<sup>1,2,3,4</sup>

3

4 <sup>1</sup>Centre for Infectious Diseases and Microbiology – Public Health, Westmead Hospital,  
5 Westmead, NSW, Australia

6 <sup>2</sup>Centre for Infectious Diseases and Microbiology Laboratory Services, Westmead Hospital,  
7 Westmead, NSW, Australia

8 <sup>3</sup>Westmead Clinical School, The University of Sydney, Westmead, NSW, Australia

9 <sup>4</sup>Marie Bashir Institute for Infectious Diseases and Biosecurity, The University of Sydney,  
10 Camperdown, NSW, Australia

11

12 Corresponding author: Winkie Fong – [wfon4473@sydney.edu.au](mailto:wfon4473@sydney.edu.au)

13

## 14 **Abstract**

15 *Bordetella pertussis* is the primary causative agent of pertussis, a highly infectious  
16 respiratory disease associated with prolonged coughing episodes. Pertussis infections are  
17 typically mild in adults, however in neonates, infections can be fatal. Despite successful  
18 vaccine uptake, the disease is re-emerging across the globe, therefore it is critical to  
19 determine the mechanism by which *B. pertussis* is escaping vaccination control. Studies  
20 have suggested that significant changes have occurred in *B. pertussis* genomes in response  
21 to whole cell and acellular vaccines. Continued molecular monitoring is therefore crucial for  
22 public health surveillance.

23

24 High-resolution molecular surveillance of *B. pertussis* can be achieved through the  
25 sequencing of the whole genome. In public health laboratories, whole genome sequencing  
26 is primarily performed by short-read sequencing technologies as they are most cost-  
27 effective. However short read sequencing does not resolve the extensive genomic

28 rearrangement evident in *Bordetella* genomes. This is because repeat regions present in  
29 *Bordetella* genomes are collapsed by downstream analysis. For example, the *B. pertussis*  
30 genome contains more than 200 copies of the IS481 insertion element, hence assemblies  
31 generally consist of >200 contigs. Advancements in long-read technologies however  
32 increase the potential to circularise and close genomes by bridging the locations of the  
33 IS481 insertion element.

34

35 In this study, we aimed to contextualise the *Bordetella* spp. circulating in NSW, Australia and  
36 assess their relationship with global isolates utilising core genome, SNP and structural  
37 clustering analysis using long read technology. We report five closed genomes of *Bordetella*  
38 spp. isolated from Australian patients. Two of the three *B. pertussis* closed isolates, were  
39 unique with their own genomic structure, while the other structurally clustered with global  
40 isolates. We found that Australian *B. holmesii* and *B. parapertussis* strains cluster with global  
41 isolates and do not appear to be unique to Australia. Australian draft *B. holmesii* SNP  
42 analysis showed that between 1999 and 2007, isolates were relatively similar, however  
43 post-2012, isolates were distinct from each other. The closed isolates can also be used as  
44 high-quality reference sequences for both surveillance and other investigations into  
45 pertussis spread.

46

#### 47 **Keywords**

48 *Bordetella pertussis*, *Bordetella holmesii*, *Bordetella parapertussis*, Nanopore, Illumina

49

#### 50 **Background**

51 Pertussis, or whooping cough, caused by *Bordetella pertussis* (and occasionally *Bordetella*  
52 *parapertussis* and *Bordetella holmesii*) is a severe respiratory infection characterized by  
53 prolonged coughing episodes<sup>1</sup>. In the pre-vaccination era, pertussis was the foremost cause  
54 of infantile death due to an infectious disease in the first year of life<sup>1</sup>. Recently however,  
55 pertussis has been re-emerging over the past few decades and this is despite high  
56 vaccination coverage rates. The causes of this resurgence are possibly related to vaccine  
57 escape, waning immunity or poor vaccine compliance. Further, with the rise of molecular  
58 based diagnostic tests it is now clear that other *Bordetella* species such as *Bordetella*  
59 *parapertussis* and *Bordetella holmesii* can also cause a mild form of pertussis-like illness. In  
60 Australia, *B. holmesii* can circulate at a prevalence of between 6.5 - 16.8%<sup>2</sup> and is  
61 indistinguishable from *B. pertussis* when using the common PCR diagnostic target of *IS481*<sup>3</sup>.

62

63 Another possible factor contributing to the re-emergence of *B. pertussis* is a change in the  
64 antigenic structure of circulating strains. Current acellular vaccines vary between countries  
65 and contain 2-5 immunogenic antigens produced by *B. pertussis* – Pertussis toxin (PT),  
66 Filamentous haemagglutinin (FHA), Pertactin (PRN), Fimbriae (FIM) and the adenylate  
67 cyclase toxin (ACT). This has potentially led to the natural selection of circulating strains with  
68 antigenic variants not present in the vaccine. Changes in antigenic variation have been  
69 documented independently in several countries, including Australia, such as the emergence  
70 of PRN-deficient<sup>4, 5</sup>, FHA-deficient<sup>6</sup> or PT-deficient<sup>7</sup> strains of *B. pertussis*. It also appears  
71 that over recent years, *B. pertussis* strains have diverged from historical clones to produce a  
72 novel allele for the PT promoter *ptxP*<sup>8</sup>. Prior to the introduction of the vaccine, circulating  
73 strains encoded *ptxP1*, however, current predominating strains contain *ptxP3*. Furthermore,  
74 these recent *ptxP3* strains also produce 1.5 times more PT than their *ptxP1* counterparts<sup>8</sup>.

75

76 Molecular surveillance of respiratory pathogens such as *B. pertussis* is paramount for  
77 effective disease control<sup>9</sup>. Molecular typing of *B. pertussis* has been transformed with the  
78 advent of higher-resolution genome sequencing methods such as whole genome  
79 sequencing (WGS). Available isolates have allowed the development of single nucleotide  
80 polymorphism (SNP) typing that is WGS-based. *B. pertussis* strains can be classified into SNP  
81 clusters (I-VI)<sup>10</sup>. SNP clusters can be defined by specific SNP changes in genes, the primary  
82 SNP change being in *ptxP* (G > A mutation in the intergenic region of *B. pertussis* Tohama I  
83 BP3782 - designated *ptxP3*) and thus the sole definer of SNP Cluster I<sup>10</sup>. In Australia, SNP  
84 Cluster I can be further divided into 5 epidemic lineages (EL1-EL5)<sup>11</sup>.

85

86 WGS can provide a wealth of information that can be utilised for SNP-based typing or  
87 observations of the vaccine antigen sequences using *de novo* assembly methods. However,  
88 short-read based *de novo* assembly algorithms conglomerate repeat regions of the genome  
89 resulting in basic and limited understandings of genomic structure and complexity<sup>12</sup>. This is  
90 problematic in the assembly of the *B. pertussis* genome since it contains more than 200  
91 copies of the *IS481* insertion element<sup>13</sup>. As a result, short-read assemblies are highly  
92 fragmented, (often >200 contigs) which can lead to information being missed. Previous  
93 research has also determined that the *B. pertussis* genome is subject to large genomic  
94 inversions and rearrangements, with most mediated by *IS481*<sup>14</sup>. The type and positions of  
95 the rearrangements are grouped by *B. pertussis* phylogenetic clusters<sup>14</sup>. However, these  
96 structural rearrangements are not unique to *B. pertussis*, in fact, *B. parapertussis* and *B.*  
97 *holmesii* also carry these characteristics<sup>15</sup>.

98

99 Generating high-quality reference sequences that represent locally circulating strains can  
100 more accurately identify variable regions of the genome, virulence and antibiotic resistance  
101 markers and greatly support the accuracy of phylogenetic analysis<sup>16, 17</sup>. Advancements in  
102 long-read technologies like Nanopore and PacBio sequencing have increased the potential  
103 to circularise and close genomes by bridging the locations of the *IS481* insertion element<sup>18-</sup>  
104 <sup>20</sup>. Further, as these genomic rearrangements have only been investigated in strains from  
105 the northern hemisphere, primarily the US, the genomic rearrangements prevalent in  
106 strains circulating in Australia and their significance for molecular surveillance is currently  
107 unknown.

108

109 Therefore, this study sought to investigate the mechanisms of the potential evolution of  
110 *Bordetella* spp. in Australia using a combination of long and short read technologies to  
111 contextualise genomic rearrangements within previously defined SNP lineages. The study  
112 present five closed *Bordetella* spp. genomes from the southern hemisphere that can be  
113 used as references in future studies investigating *Bordetella* spp. strains circulating in  
114 Australia.

115

116

## 117 **Results**

### 118 **Sequencing Statistics**

119 Five isolates were sequenced using both Nanopore long read sequencing and Illumina short  
120 reads to close and polish the genome. Statistics of the sequencing results are presented in  
121 Table 1.

122

123

124

125

126 Table 1: Summary statistics of closed *Bordetella* spp. genomes sequenced

| Sample    | Total Reads | Mean Read Length | Read Length N50 | Genome Length | GC content (%) | Count of CDS | Count of tRNAs | Count of rRNA |
|-----------|-------------|------------------|-----------------|---------------|----------------|--------------|----------------|---------------|
| CIDM-BH3  | 467,478     | 4,731.3          | 9,416           | 3,696,928     | 62.69          | 3,683        | 56             | 9             |
| CIDM-BP2  | 501,426     | 6,830.1          | 14,169          | 4,109,518     | 67.70          | 3,971        | 64             | 9             |
| CIDM-BP3  | 622,884     | 8,636.8          | 17,331          | 4,093,865     | 67.71          | 3,954        | 64             | 9             |
| CIDM-BP5† | 41,276      | 8,813            | 16,164          | 4,104,145     | 67.71          | 3,943        | 64             | 9             |
| CIDM-BPP2 | 138,446     | 6,830.1          | 20,730          | 4,775,256     | 68.10          | 4,573        | 65             | 9             |

127 †Sequencing was only ran for 24 hours

128

129 In addition, we further sequenced seven *B. holmesii* isolates using short read technology

130 and sequencing and assembly statistics are listed in Table 2.

131

132 Table 2: Summary of the Illumina sequencing and assembly statistics of all *B. holmesii*  
133 isolates.

| Sample   | Total Reads | N50    | Contigs (>1000 bp) | Genome Coverage (%) | GC content (%) | Count of CDS |
|----------|-------------|--------|--------------------|---------------------|----------------|--------------|
| CIDM-BH1 | 3,614,054   | 29,344 | 189                | 94.55               | 62.76          | 3,396        |
| CIDM-BH2 | 3,432,966   | 29,426 | 188                | 93.87               | 62.79          | 3,557        |
| CIDM-BH4 | 2,588,521   | 26,580 | 197                | 93.87               | 62.78          | 3,383        |
| CIDM-BH6 | 2,542,224   | 27,377 | 197                | 93.91               | 62.78          | 3,386        |
| CIDM-BH7 | 2,564,461   | 25,733 | 202                | 93.89               | 62.78          | 3,385        |
| CIDM-BH8 | 2,939,553   | 28,704 | 193                | 93.89               | 62.78          | 3,382        |

134

135

136 **Sequenced *Bordetella pertussis* isolates exhibited IS481 mediated genomic**  
137 **rearrangements**

138 Three strains of *B. pertussis* were sequenced with long-read sequencing, and closure of each  
139 genome was successful. *B. pertussis* strain CIDM-BP3 and CIDM-BP5 carried intact genes of  
140 *prn* with CIDM-BP5 demonstrated to express PRN in previous work<sup>21</sup>. CIDM-BP2, however,  
141 contained an *IS481* insertion at position 1598 of *prn*. *B. pertussis* strain CIDM-BP3 was a  
142 *ptxP1* isolate, previously described as belonging to the non-Cluster I SNP cluster with a SNP  
143 profile of 18 (SP18)<sup>21</sup>. Sequence alignments using the closed genome of CIDM-BP3  
144 corroborated with the previous data<sup>21</sup>. Both *B. pertussis* strains CIDM-BP2 and CIDM-BP5  
145 harboured the *ptx3* promoter and by definition<sup>10</sup> were both part of SNP Cluster I. Further  
146 pairwise alignment analysis by BLASTn of CIDM-BP2 and CIDM-BP5, against key SNP  
147 positions, classified them both as part of EL1, designated SP12 and SP13, respectively, due  
148 to the SNP mutations in *gor*, *sphB3*, and BP3546.

149

150 The 23S ribosomal RNA was also investigated via *in silico* analysis and no mutations were  
151 discovered in any *B. pertussis* strains. This indicates that these strains are macrolide  
152 susceptible and is in line with phenotypical results for resistance against macrolides  
153 (Supplementary Material). A selection of global closed *B. pertussis* isolates (n=192) (Figure  
154 1) and previously described<sup>14, 15</sup> genomes used for structural clustering (n=472) (Figure S1)  
155 were utilised for core phylogenomic and genomic rearrangement analysis respectively.  
156 Results of both analyses revealed CIDM-BP2 aligned with more recent U.S.A and UK *ptxP3*  
157 isolates and like CIDM-BP2, the international strains contained an *IS481* inserted at position  
158 1598 of the PRN gene. In addition, CIDM-BP2 shared the same genomic rearrangements  
159 previously observed in J247, I755, I228, I469, and I472 from Cluster-BP-12 (Figure 2).

160 Meanwhile CIDM-BP3 is closely related to *ptxP1* isolates from India (2017) and the U.K  
161 (1967) with a fully intact *prn* gene. CIDM-BP3 was observed to be more similar to strains in  
162 Cluster-BP-19 from the U.K (B226 and B228) rather than the United States (Figure S1). In  
163 terms of genomic structural organisation, CIDM-BP3 possessed the same orthologous locally  
164 collinear blocks (LCB) as H866, B226 and B228 (Figure 3) but differed from these isolates due  
165 to *IS481* mediated inversions and hence designated as a singleton. Similarly, CIDM-BP5 was  
166 also designated as a singleton due to it having a genomic organisation that was not  
167 previously documented. In addition, inversions resulted in an insertion of an *IS481* element  
168 downstream of *lysR* family transcriptional regulators in *ptxP3* isolates on two occasions,  
169 once in CIDM-BP2 and once in CIDM-BP5 (Figure 3 and Supplementary material 2).  
170

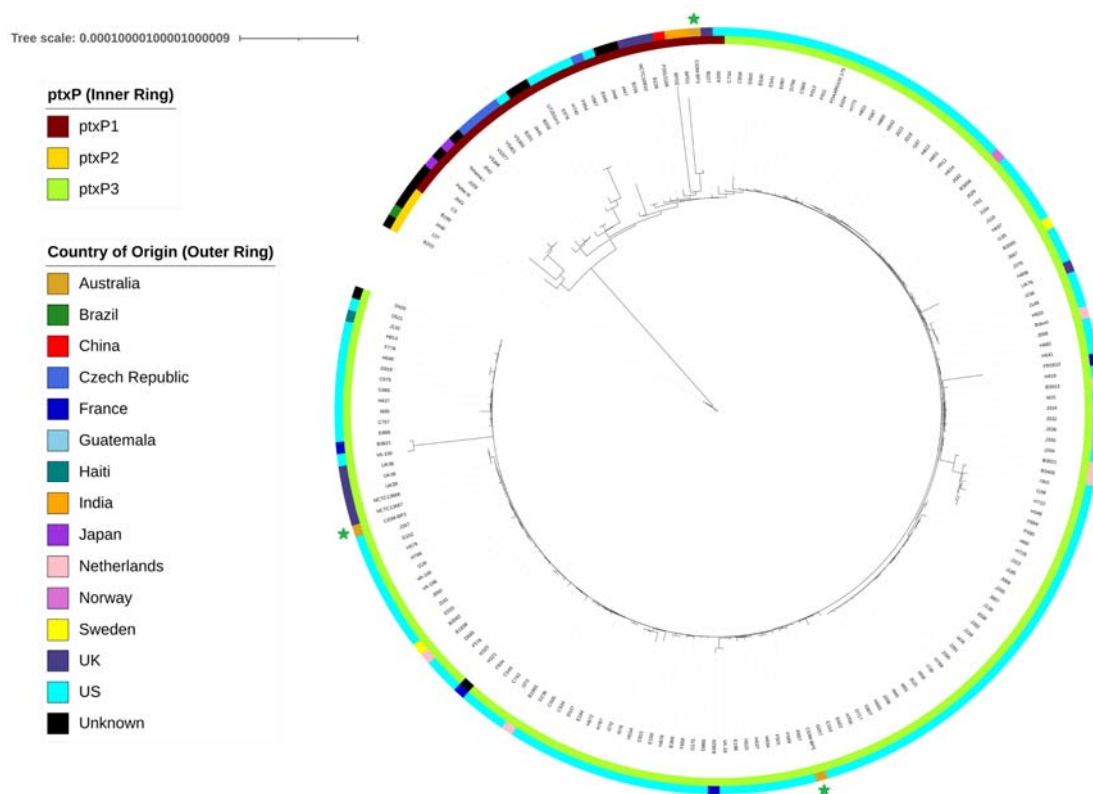

171  
172 Figure 1: Core gene phylogeny of global closed *B. pertussis* isolates (n=192) based on 3,383  
173 core genes using Roary. The tree shows that the *B. pertussis* isolates selected for long-read



174 sequencing in this study (green star) represent different strains that circulate globally. The  
175 inner ring denotes *ptxP* alleles and the outer ring indicates country of origin.

176

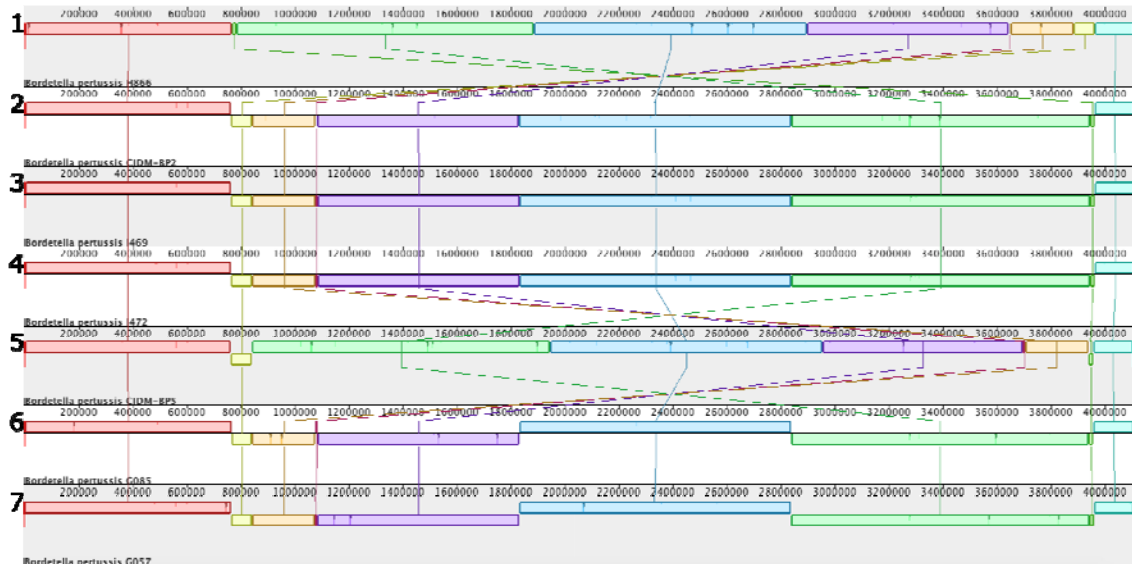

177

178 Figure 2: Genome structural variability comparisons of closed *B. pertussis ptxP3* genomes.  
179 Australian strains CIDM-BP2 and CIDM-BP5 are in position 2 and position 5 respectively, and  
180 are shown alongside their closest relatives by core gene phylogeny, 1469 and 1472 for CIDM-  
181 BP2, and G085 and G057 for CIDM-BP5 (Figure 1). H866 was used to allow a comparison  
182 with a previous study<sup>14</sup>. Image generated by progressiveMauve<sup>22</sup>.

183

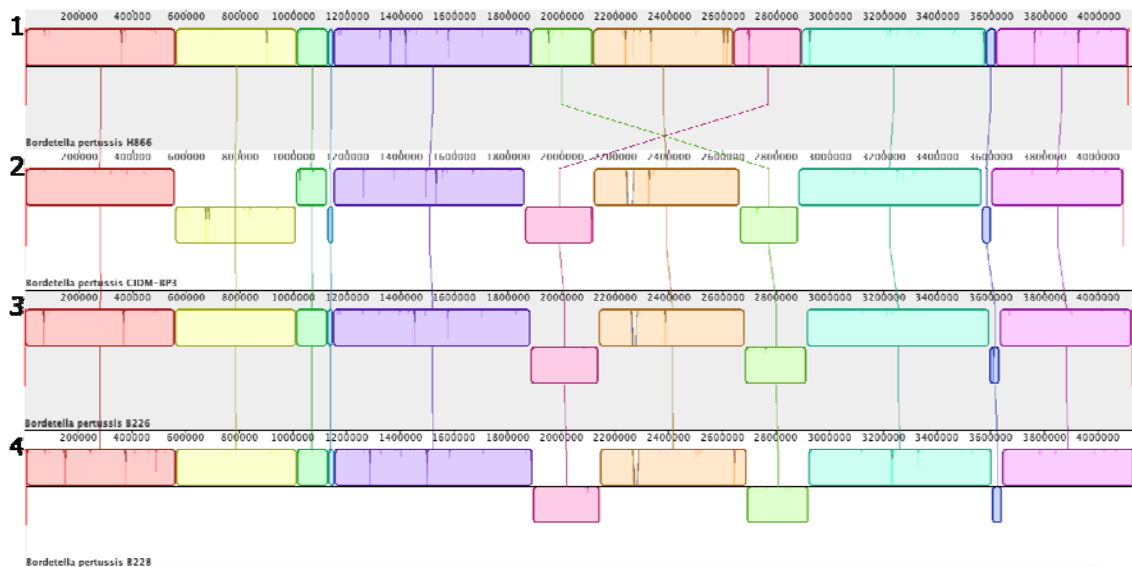

184

185 Figure 3: Structural rearrangement comparisons of closed *B. pertussis ptxP1* genomes, with  
186 *B. pertussis* H866 as the anchoring genome. The singleton CIDM-BP3 (position 2) is featured

187 in this figure comparing it to neighbouring isolates (B226 and B228) from the core gene  
188 phylogeny. Image generated by progressiveMauve<sup>22</sup>.  
189

190

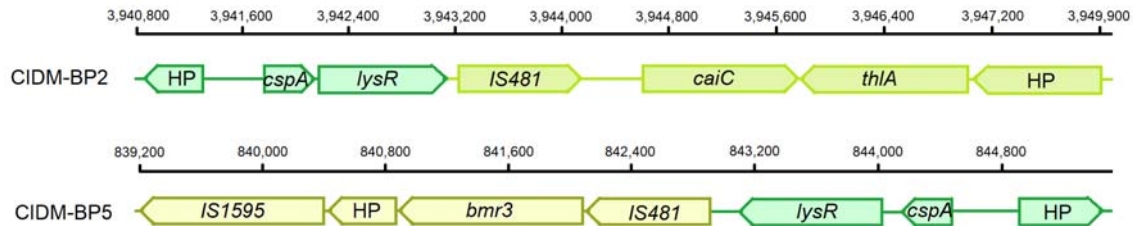

191

192 Figure 4: Schematic diagram of the two selected genomic rearrangement sites of CIDM-BP2  
193 and CIDM-BP5. Represented here is the *IS481* element and three upstream and downstream  
194 flanking genes, the colours are derived from the LCB blocks in Figure 2. In both examples the  
195 *IS481* element has inserted downstream of *lysR*, as represented by the colours of the *IS481*.  
196 The flanking gene names are as follows – hypothetical protein (HP), cold shock protein  
197 (*cspA*), crotonobetaine/carnitine--CoA ligase (*caiC*), acetyl-CoA acetyltransferase (*thIA*) and  
198 Multidrug resistance protein 3 (*bmr3*).  
199

199

200

## 201 CIDM-BPP2 possessed a genomic structure that was previously observed

202 Comparison of CIDM-BPP2 to available RefSeq sequences (n=79) demonstrated that CIDM-  
203 BPP2 clustered with B160 (Figure 5). Singleton B160 (and CIDM-BP2) differs from Cluster-PP-  
204 02 by a 1,608 bp deletion in an Invasin gene (GenBank: AP019378.1). Therefore, CIDM-BPP2  
205 forms a new cluster with B160. A loss of tandem repeats within the Invasin gene in Cluster-  
206 PP-02, resulted in the truncation of gene length, however, appears to not disrupt gene  
207 function. Examination of virulence markers of the *B. paraptussis* isolate revealed the  
208 presence of two genes that were part of a type VI secretion system (T6SS), homologous to  
209 *Pseudomonas aeruginosa* TssB1/HsiB1/VipA and TssC1/HsiC1/VipB T6SS (78% homology).  
210 Further examination showed unlike the *B. paraptussis* Bpp5 reference genome (Genbank:  
211 NC\_018828.1) which contains only 7 of the 13 T6SS core components, CIDM-BPP2 and *B.*

212 *parapertussis* 12822 (Genbank: NC\_002928.3) contains all 13 core components, and  
213 designated T6SS Type I subtype i3 (Supplementary Table 1)

214

215

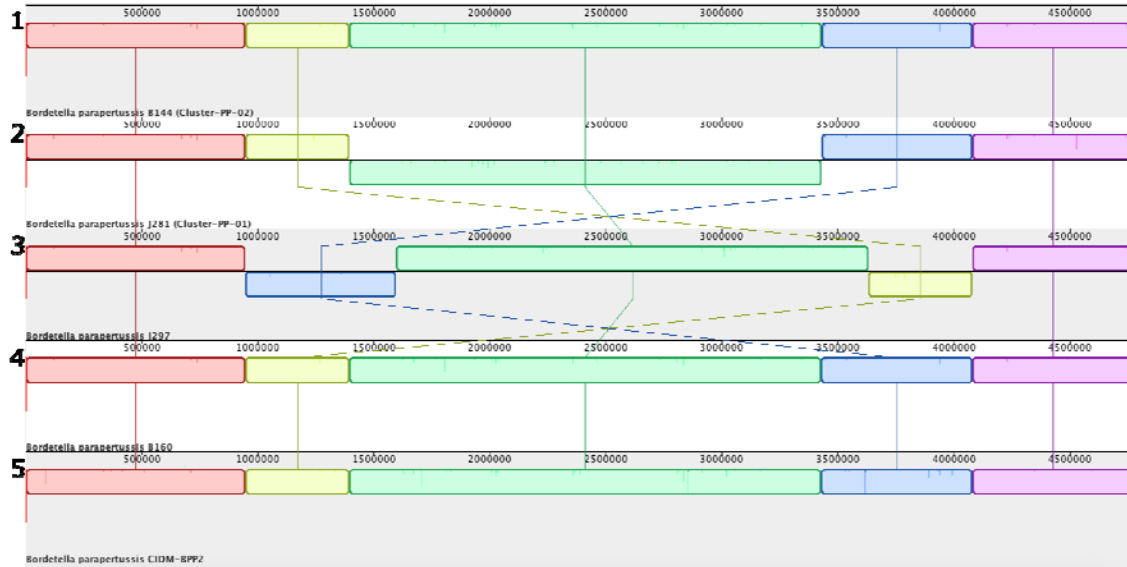

216

217 Figure 5: Structural rearrangement comparisons of all *B. parapertussis* structural clusters  
218 referenced by a representative isolate selected from Cluster-PP-02 (position 1). J297  
219 (singleton) is in position 3 as featured in a previous study and B160 (singleton) is in position  
220 4 as it was the closest strain to CIDM-BPP2 (position 5) in the core phylogenetic analysis  
221 (Figure S2). This figure shows that Cluster-PP-02 and B160 contain the same LCB  
222 orientations, however, in depth analysis reveals a 1.6kb deletion in Cluster-PP-02 isolates  
223 (genome coordinates 4,637,269 to 4,642,986). Image generated by progressiveMauve<sup>22</sup>

### **Global Comparison of *B. holmesii***

Phylogenetic analysis of all available *B. holmesii* isolates on RefSeq (n=84), SRA (n=10) and local (n=8), showed that CIDM-BH3 groups with Cluster-BH-01 as LCBs matched the genomic structure of the selected representative H869 (Figure 6). Like *B. pertussis* the structural rearrangements were mediated by *IS481*.

Further core genome analysis also disclosed that certain clusters display a similar absence of genes. A sub-cluster in Cluster-BH-01 is highly distinguished from other closed isolates due to a group of 53 missing genes. Half of the missing genes are IS elements, the remaining are listed in Supplementary Material 2. Whole genome screening of virulence markers using Abricate to interrogate VFDB, revealed that *B. holmesii* contains seven of the 10 homologs of the *B. pertussis* *bpl* locus, ranging from 76.39- 83.04% identity to 91.81- 98.86% coverage. *B. holmesii* lacks genes *bplG* (sugar transferase), *bplH* (glycosyl transferase) and *bplI* (lipopolysaccharide biosynthesis protein), which are genes involved in band-A lipopolysaccharide biosynthesis in *B. pertussis*<sup>23</sup>. Overall, *B. holmesii* lacks 87% of the virulence markers of *B. pertussis* as identified by VFDB and confirmed by BLASTn.

In total, there were 468 unique core SNP variants across Australian *B. holmesii* isolates (Supplementary Material 2). CIDM-BH1, CIDM-BH4, CIDM-BH6 and CIDM-BH7 formed a cluster (Figure 7) with 0 – 34 core SNPs between them. CIDM-BH1 and CIDM-BH4 differed from each other by 1 SNP, which is consistent as they were isolated from the same patient.

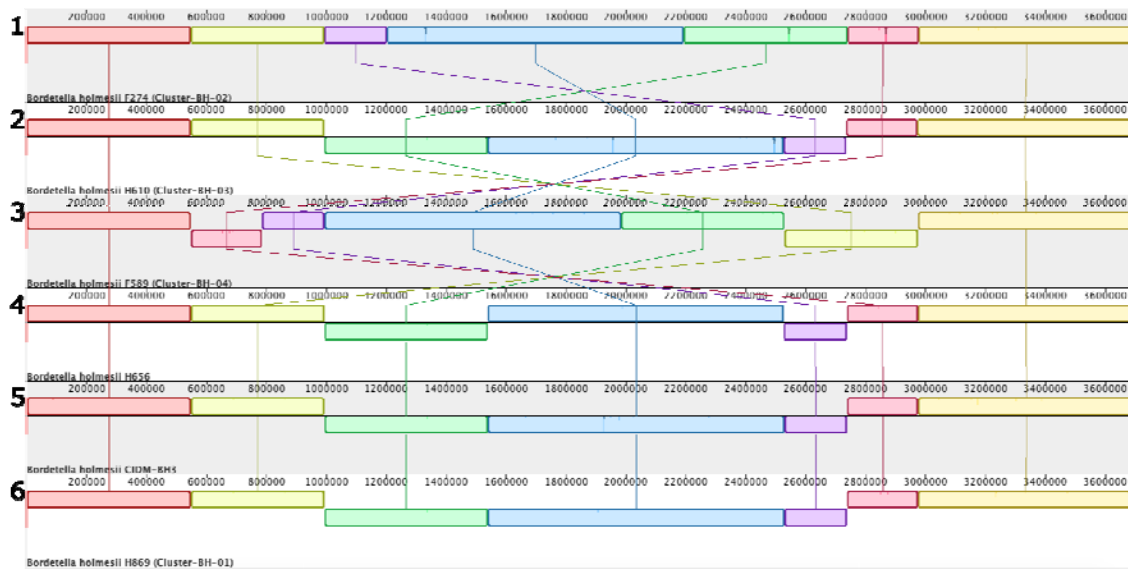

Figure 6: Genome structural rearrangements of *B. holmesii*. All structural clusters are featured, anchored by a representative isolate from Cluster-BH-02 (F274). CIDM-BH3 is featured in position 5, alongside its closest isolates H656 and H869 from Cluster-BH-01. Image generated by progressiveMauve<sup>22</sup>.

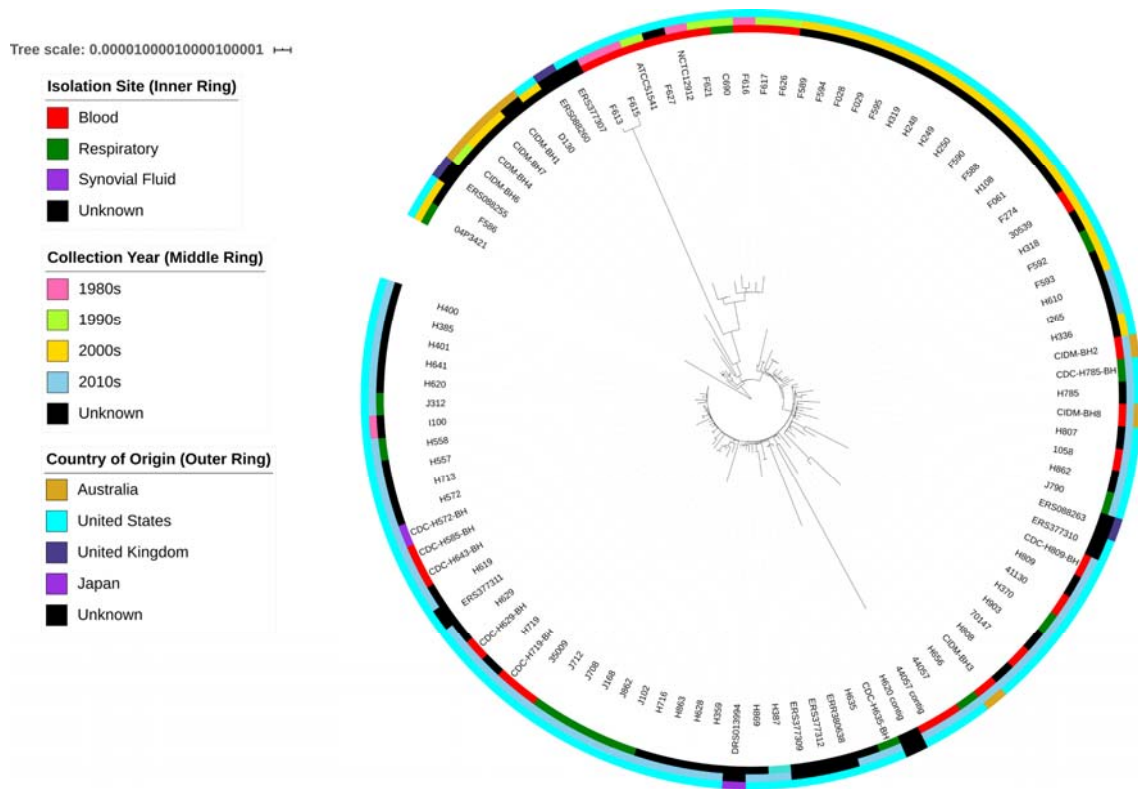

Figure 7: Core phylogenetic tree of all *B. holmesii* (n=101) used in the present study from NCBI SRA and RefSeq based on 2,747 core genes. Metadata is displayed in concentric circles with site of isolation (inner ring), year of collection (middle ring) and country of origin (outer ring) where available. The tree shows that Australian isolates pre-2007 are clustered together, while more recent isolates post-2012 are spread out across the globe with no specific grouping.

## **Discussion**

Evidence of changes in the molecular epidemiology of *B. pertussis* have been prevalent across the globe<sup>24</sup>. Further research into identifying forces driving this change are critical to prevent and control the re-emergence of *B. pertussis*. This study aimed to contextualise Australian *Bordetella* spp. globally. By utilising both long and short-read sequencing technologies this study generated high quality reference sequences of circulating strains of *Bordetella* spp. in Australia and provided further evidence of genomic evolution within the genus.

The *B. pertussis* genomes sequenced contained representatives of the predominating strain (*ptxP3*) in NSW with one being PRN-positive (CIDM-BP5) and one PRN-negative (CIDM-BP2), and a unique *ptxP1* PRN-positive isolate from 2015 (CIDM-BP3). *In silico* analysis confirmed that CIDM-BP3 and CIDM-BP5 each harboured an intact *prn* gene with no evidence of IS481 insertion, supporting their phenotypic PRN production<sup>21</sup>. The *prn* gene in CIDM-BP2 contained an IS481 insertion in position 1598, thus rendering the *prn* gene defective. These isolates were also classified with a previously described SNP clustering system, CIDM-BP2 and CIDM-BP5 are SNP Cluster I EL1 as SP12 and SP13 respectively, and CIDM-BP3 is a non-Cluster I SP18<sup>21</sup>. The isolates were also screened for known resistance mechanisms as macrolide resistant strains of *B. pertussis* have been observed in China. Macrolide resistance is the result of a 23S ribosomal RNA SNP mutation<sup>25, 26</sup> and none of the study isolates exhibited genotypes consistent with resistance in this gene.

Australian *B. pertussis* isolates harbour genomic rearrangements similar to those described previously in the northern hemisphere<sup>14, 15</sup>. Utilising the same clustering system, CIDM-BP3

and CIDM-BP5 were found to be singletons and CIDM-BP2 was part of Cluster-BP-12. For *B. parapertussis*, CIDM-BPP2 aligned closest with Cluster-PP-02 and singleton B160. However, with a deletion of a 1.6kb region in Cluster-PP-02, it supports the addition of CIDM-BPP2 to singleton B160, and the formation of a new cluster. CIDM-BH3 was more closely related to other closed *B. holmesii* isolates from the U.S.A and clustered with Cluster-BH-01. Interestingly, core genome phylogeny can predict structural clusters, however, full confirmation of genome rearrangements is only possible with closed genome assemblies. Phylogenetic analysis on its own goes some way to predict the structural cluster of draft genomes, however full confirmation requires long-read sequencing at a cost that is significantly higher than short-read high throughput sequencing.

The genomic inversions reported previously<sup>14, 15</sup> here, can be mediated by insertion sequences, primarily *IS481* in *B. pertussis* and *B. holmesii*, and *IS1001* in *B. parapertussis*. As in previous work, the study found that *IS481* and *IS1001* flanked all ends of all identified rearrangements. These IS are present in multiple copies in all *Bordetella* genomes and can number at over 200 copies in *B. pertussis*. The impact of these IS elements requires further investigation as previous studies have indicated that IS elements can upregulate upstream and downstream flanking gene expression in *B. pertussis*<sup>27</sup>. This lends to the hypothesis that specific structural clusters could be more virulent than others<sup>27</sup>, as in some cases, *IS481* was introduced in front of transcriptional regulators post-inversion. The hypothesis can be addressed using RNA-Seq to resolve the transcriptome of strains from different structural clusters and comparing the impact of gene expression due to *IS481*.



A deeper core genome analysis into *B. holmesii* isolates in NSW showed that between 1999 and 2012, isolates were part of a specific cluster, differing by up to 32 SNPs only. More recent isolates (post-2012), however, differ from pre-2012 isolates by more than 72 SNPs indicating a potential change in circulating strains. Although, the small number of *B. holmesii* isolates in NSW makes a solid conclusion hard to draw. Given the more recent discovery of *B. holmesii* causing pertussis-like symptoms, a culture-independent approach to sequencing can be applied to *B. holmesii* positive respiratory samples to potentially close this gap in knowledge of the molecular epidemiology of *B. holmesii* in Australia.

Virulence marker investigations across the *Bordetella* spp. revealed that various virulence-associated genes of *B. pertussis*, were not present on the genome of *B. parapertussis* or *B. holmesii*. In *B. parapertussis* CIDM-BPP2, all components of a T6SS were discovered, homologous to the T6SS found in *P. aeruginosa* and *V. cholerae*. This T6SS has also been discovered in *B. bronchiseptica* RB50, and whether the T6SS in *B. parapertussis* remains functional will have to be further investigated. *B. parapertussis* carries all the same virulence genes as *B. pertussis* with varying mutations including the *ptx-ptl* operon, however, as previously demonstrated, this operon in *B. parapertussis* is dysfunctional<sup>28</sup>. In comparison, *B. holmesii* lacks a large majority (87%) of the virulence markers found in *B. pertussis*, these include the vaccine antigens of *B. pertussis*.

In conclusion, the study applied structural clustering on closed genomes of the *Bordetella* spp. to determine where NSW isolates sit on a global scale. This study also presents the first five high-quality Southern hemisphere closed genomes of *Bordetella* spp. These reference genomes are crucial for future public health investigations of this significant group of

respiratory pathogens given the level of genomic rearrangement displayed by all species investigated in this study. While this study demonstrates further evidence of genomic evolution of the *Bordetella* species, dwindling isolate numbers due to diagnostic testing changes hamper the capability to continue monitoring *Bordetella* spp.

## **Methods**

### **Strain selection and culture conditions**

Chosen strains (Table 3) were stored at the Centre of Infectious Diseases and Microbiology Laboratory Services (CIDMLS) Identification Laboratory were cultured on Charcoal Blood Agar (*B. pertussis* and *B. parapertussis*) without Cephalexin (CBA) or Horse Blood Agar (HBA) (*B. holmesii*) for 7 days at 37°C.

Table 3: *Bordetella* spp. strains selected for both Nanopore and Illumina sequencing

| Strains                         | Isolation Year | Isolation Site | Sequencing |
|---------------------------------|----------------|----------------|------------|
| <i>Bordetella pertussis</i>     |                |                |            |
| CIDM-BP2                        | 2011           | Respiratory    | Nanopore   |
| CIDM-BP3†                       | 2015           | Respiratory    | Nanopore   |
| CIDM-BP5                        | 2008           | Respiratory    | Nanopore   |
| <i>Bordetella parapertussis</i> |                |                |            |
| CIDM-BPP2                       | 1993           | Respiratory    | Nanopore   |
| <i>Bordetella holmesii</i>      |                |                |            |
| CIDM-BH1                        | 2000           | Blood          | Illumina   |
| CIDM-BH2                        | 2014           | Blood          | Illumina   |
| CIDM-BH3                        | 2016           | Blood          | Nanopore   |
| CIDM-BH4                        | 2000           | Blood          | Illumina   |
| CIDM-BH6                        | 1999           | Blood          | Illumina   |
| CIDM-BH7                        | 2007           | Unknown        | Illumina   |
| CIDM-BH8                        | 2012           | Blood          | Illumina   |

†This isolate has been published previously as L2263/BP7<sup>21</sup>

### DNA Extraction and Quality Control Metrics

Two forms of DNA extraction were employed in this study, as not all strains were sequenced by Nanopore sequencing on the MinION platform (Table 3). DNA was extracted from isolates for long read sequencing (Nanopore) using the DNeasy® UltraClean® Microbial Kit (Qiagen, Germany) with modifications. Briefly, two loopfuls of culture were picked and inoculated into the Powerbead tube provided containing both Powerbead solution and solution SL. Cells were lysed mechanically for 2 minutes and subsequent steps were performed according to Manufacturer's instructions. DNA integrity was assessed by running the extracted DNA on a 0.6% (w/v) agarose gel for 3 hours at 75V in 1X TBE sized with a Quick-Load® 1 kb Extend DNA ladder (New England Biosciences, USA) to ensure that majority of the fragment sizes were > 30 kb.

Isolates for short read sequencing (Illumina) were extracted with the DNeasy Blood and Tissue kit (QIAGEN, Germany) with modifications. Two colonies were picked from the culture plates and inoculated directly into the buffer supplied in the kit and Proteinase K. The cells were lysed at 56°C on a heater-shaker for 3 hours, and subsequently extracted following the manufacturer's instructions.

All extracted DNA were quality assessed spectrophotometrically (AllSheng, China) and DNA quantity for long read sequencing was measured on a Qubit™ 2.0 Fluorimeter using the dsDNA BR Assay Kit (ThermoFisher Scientific, USA). DNA quantity for short read sequencing

was measured using Quant-iT™ PicoGreen™ dsDNA Assay Kit (ThermoFisher Scientific, USA).

DNA was stored in -20°C until library preparation.

### Library Preparation and Sequencing

All extracted DNA was prepared with the Illumina NexteraXT DNA Library Preparation Kit v2.5 (Illumina, USA) and sequenced on the Illumina NextSeq 500.

Libraries for isolates that were sequenced on the Nanopore was prepared using the Rapid barcoding Kit SQK- RBK 004 (Oxford Nanopore, U.K) using > 1,000 ng of input DNA. Apart from the change in input amount, all subsequent manufacturer's instructions were followed. DNA was sequenced on a FLO-MIN106 flow cell for 24-48 hours without basecalling.

### Bioinformatics

Base calling, assembly and annotation

Long read base calling in high accuracy mode and demultiplexing was performed on Guppy (v 2.4.5) on a GPU Amazon Web Service instance (c5.Metal). Demultiplexed reads were then *de novo* assembled with Flye (v 2.7b)<sup>29</sup> with the "--asm-coverage" parameter set to 30 and an expected genome size of 4.0 Mb. Following long-read assembly, the sequence was corrected with Racon (v 1.3.1)<sup>30</sup> four times, and Medaka (v 0.11.5)<sup>30</sup> twice. The assembly was then polished with corresponding Illumina reads using Pilon (v 1.23)<sup>31</sup> and repeated until there were no more changes. The assembly was subsequently reordered so that the open reading frame of *dnaA* was in the positive strand.

All short read sequences were assembled with SPAdes (v 3.12.0)<sup>32</sup>, then annotated with Prokka (v 1.12)<sup>33</sup> and Barnapp (v 0.6) (<https://github.com/tseemann/barrnap>), then scanned for virulence factors (VFDB)<sup>34</sup> and resistance markers (CARD)<sup>35</sup> with ABRicate (v 0.9.8) (<https://github.com/tseemann/abricate>). The type VI secretions system analysis was performed by SecReT6<sup>36</sup>.

### Phylogenetic analysis

To determine where the Australian *Bordetella* spp. isolates sat globally, all closed RefSeq genomes were downloaded. Raw reads from SRA were also utilised and assembled with SPAdes (v 3.12.0)<sup>32</sup>. All assemblies and closed sequences were annotated with Prokka (v 1.12)<sup>33</sup> and Barnapp (v 0.6) (<https://github.com/tseemann/barrnap>).

For *B. pertussis*, a random selection of RefSeq sequences were extracted based on country and year of isolation (n=189). In addition, previously described closed genomes<sup>14</sup> were downloaded from RefSeq (n=472) and reanalysed with Australian *B. pertussis* isolates. SNP clusters were determined by BLASTn<sup>37</sup> with a custom database of SNPs positions from a previously published study<sup>10, 11</sup>. *B. holmesii* analysis was performed with all available RefSeq (n=84) and SRA sequences (n=10). SNP analysis of *B. holmesii* was performed by Snippy (v 4.1.0) and SNP-dist (v 0.6). For *B. parapertussis*, only closed sequences featured in Weigand et al were used for analysis. A list of all strains used in the study are in Supplementary Material 1.

For each *Bordetella* spp. generated GFF files from Prokka were used for phylogenetic analysis with Roary (v 3.1.2)<sup>38</sup>, and the tree was drawn with IQ-TREE (v 1.6.7)<sup>39</sup> and

ModelFinder<sup>40</sup>, with the best model being TVM+F+l. The core phylogenetic tree was visualised with iTOL (v 5.7)<sup>41</sup>. Utilising the phylogenetic results, strains closest to the Australian isolates were extracted for structural rearrangement analysis with progressiveMauve (v 2.4.0)<sup>22</sup>, the same cut-offs applied by Weigand et al<sup>14</sup> were applied in the study.

Genome sequencing data has been published on NCBI under Bioproject: PRJNA695314

## References

1. Mattoo S, Cherry JD. Molecular pathogenesis, epidemiology, and clinical manifestations of respiratory infections due to *Bordetella pertussis* and other *Bordetella* subspecies. Clin Microbiol Rev. 2005;18(2):326-82. doi:10.1128/CMR.18.2.326-382.2005
2. Fong W, Timms V, Holmes N, Sintchenko V. Detection and incidence of *Bordetella holmesii* in respiratory specimens from patients with pertussis-like symptoms in New South Wales, Australia. Pathology. 2018;50(3):322-6. doi:10.1016/j.pathol.2017.10.014
3. Pittet LF, Emonet S, Schrenzel J, Siegrist CA, Posfay-Barbe KM. *Bordetella holmesii*: an under-recognised *Bordetella* species. Lancet Infect Dis. 2014;14(6):510-9. doi:10.1016/S1473-3099(14)70021-0
4. Lam C, Octavia S, Ricafort L, Sintchenko V, Gilbert GL, Wood N, et al. Rapid increase in pertactin-deficient *Bordetella pertussis* isolates, Australia. Emerg Infect Dis. 2014;20(4):626-33. doi:10.3201/eid2004.131478
5. Safarchi A, Octavia S, Luu LD, Tay CY, Sintchenko V, Wood N, et al. Pertactin negative *Bordetella pertussis* demonstrates higher fitness under vaccine selection pressure in a mixed infection model. Vaccine. 2015;33(46):6277-81. doi:10.1016/j.vaccine.2015.09.064
6. Weigand MR, Pawloski L, Peng Y, Ju H, Burroughs M, Cassidy PK, et al. Screening and genomic characterisation of filamentous haemagglutinin-deficient *Bordetella pertussis*. Infect Immun. 2018.
7. Williams MM, Sen K, Weigand MR, Skoff TH, Cunningham VA, Halse TA, et al. *Bordetella pertussis* Strain Lacking Pertactin and Pertussis Toxin. Emerg Infect Dis. 2016;22(2):319-22. doi:10.3201/eid2202.151332
8. Mooi FR, van Loo IHM, van Gent M, He Q, Bart MJ, Heuvelman K, et al. *Bordetella pertussis* Strains with Increased Toxin Production Associated with Pertussis Resurgence. Emerg Infect Dis. 2009;15(8):1206-13. doi:10.3201/eid1508.081511
9. Bouchez V, Guglielmini J, Dazas M, Landier A, Toubiana J, Guillot S, et al. Genomic Sequencing of *Bordetella pertussis* for Epidemiology and Global Surveillance of Whooping Cough. Emerg Infect Dis. 2018;24(6):988-94. doi:10.3201/eid2406.171464
10. Octavia S, Maharjan RP, Sintchenko V, Stevenson G, Reeves PR, Gilbert GL, et al. Insight into evolution of *Bordetella pertussis* from comparative genomic analysis: evidence of vaccine-driven selection. Mol Biol Evol. 2011;28(1):707-15. doi:10.1093/molbev/msq245
11. Safarchi A, Octavia S, Wu SZ, Kaur S, Sintchenko V, Gilbert GL, et al. Genomic dissection of Australian *Bordetella pertussis* isolates from the 2008-2012 epidemic. J Infect. 2016;72(4):468-77. doi:10.1016/j.jinf.2016.01.005

12. Alkan C, Sajjadian S, Eichler EE. Limitations of next-generation genome sequence assembly. *Nat Methods*. 2011;8(1):61-5. doi:10.1038/nmeth.1527
13. Register KB, Sanden GN. Prevalence and sequence variants of *IS481* in *Bordetella bronchiseptica*: implications for *IS481*-based detection of *Bordetella pertussis*. *J Clin Microbiol*. 2006;44(12):4577-83. doi:10.1128/JCM.01295-06
14. Weigand MR, Peng Y, Loparev V, Batra D, Bowden KE, Burroughs M, et al. The History of *Bordetella pertussis* Genome Evolution Includes Structural Rearrangement. *J Bacteriol*. 2017;199(8). doi:10.1128/JB.00806-16
15. Weigand MR, Peng Y, Batra D, Burroughs M, Davis JK, Knipe K, et al. Conserved Patterns of Symmetric Inversion in the Genome Evolution of *Bordetella* Respiratory Pathogens. *mSystems*. 2019;4(6). doi:10.1128/mSystems.00702-19
16. Olson ND, Lund SP, Colman RE, Foster JT, Sahl JW, Schupp JM, et al. Best practices for evaluating single nucleotide variant calling methods for microbial genomics. *Front Genet*. 2015;6:235. doi:10.3389/fgene.2015.00235
17. Baines SL, da Silva AG, Carter GP, Jennison A, Rathnayake I, Graham RM, et al. Complete microbial genomes for public health in Australia and the Southwest Pacific. *Microb Genom*. 2020. doi:10.1099/mgen.0.000471
18. Loman NJ, Quick J, Simpson JT. A complete bacterial genome assembled de novo using only nanopore sequencing data. *Nat Methods*. 2015;12(8):733-5. doi:10.1038/nmeth.3444
19. Wick RR, Judd LM, Gorrie CL, Holt KE. Completing bacterial genome assemblies with multiplex MinION sequencing. *Microb Genom*. 2017;3(10):e000132. doi:10.1099/mgen.0.000132
20. Ring N, Abrahams JS, Jain M, Olsen H, Preston A, Bagby S. Resolving the complex *Bordetella pertussis* genome using barcoded nanopore sequencing. *Microb Genom*. 2018;4(11). doi:10.1099/mgen.0.000234
21. Xu Z, Octavia S, Luu LDW, Payne M, Timms V, Tay CY, et al. Pertactin-Negative and Filamentous Hemagglutinin-Negative *Bordetella pertussis*, Australia, 2013-2017. *Emerg Infect Dis*. 2019;25(6):1196-9. doi:10.3201/eid2506.180240
22. Darling AE, Mau B, Perna NT. progressiveMauve: multiple genome alignment with gene gain, loss and rearrangement. *PLoS One*. 2010;5(6):e11147. doi:10.1371/journal.pone.0011147
23. Allen AG, Thomas RM, Cadisch JT, Maskell DJ. Molecular and functional analysis of the lipopolysaccharide biosynthesis locus *wlb* from *Bordetella pertussis*, *Bordetella parapertussis* and *Bordetella bronchiseptica*. *Mol Microbiol*. 1998;29(1):27-38. doi:10.1046/j.1365-2958.1998.00878.x
24. Bart MJ, van Gent M, van der Heide HG, Boekhorst J, Hermans P, Parkhill J, et al. Comparative genomics of prevaccination and modern *Bordetella pertussis* strains. *BMC Genomics*. 2010;11:627. doi:10.1186/1471-2164-11-627



25. Wang Z, Cui Z, Li Y, Hou T, Liu X, Xi Y, et al. High prevalence of erythromycin-resistant *Bordetella pertussis* in Xi'an, China. *Clin Microbiol Infect.* 2014;20(11):O825-30. doi:10.1111/1469-0691.12671
26. Xu Z, Wang Z, Luan Y, Li Y, Liu X, Peng X, et al. Genomic epidemiology of erythromycin-resistant *Bordetella pertussis* in China. *Emerg Microbes Infect.* 2019;8(1):461-70. doi:10.1080/22221751.2019.1587315
27. Amman F, D'Halluin A, Antoine R, Huot L, Bibova I, Keidel K, et al. Primary transcriptome analysis reveals importance of IS elements for the shaping of the transcriptional landscape of *Bordetella pertussis*. *RNA Biol.* 2018;15(7):967-75. doi:10.1080/15476286.2018.1462655
28. Hausman SZ, Cherry JD, Heininger U, Wirsing von Konig CH, Burns DL. Analysis of proteins encoded by the ptx and pti genes of *Bordetella bronchiseptica* and *Bordetella parapertussis*. *Infect Immun.* 1996;64(10):4020-6. doi:10.1128/IAI.64.10.4020-4026.1996
29. Kolmogorov M, Yuan J, Lin Y, Pevzner PA. Assembly of long, error-prone reads using repeat graphs. *Nat Biotechnol.* 2019;37(5):540-6. doi:10.1038/s41587-019-0072-8
30. Vaser R, Sovic I, Nagarajan N, Sikic M. Fast and accurate de novo genome assembly from long uncorrected reads. *Genome Res.* 2017;27(5):737-46. doi:10.1101/gr.214270.116
31. Walker BJ, Abeel T, Shea T, Priest M, Abouelliel A, Sakthikumar S, et al. Pilon: an integrated tool for comprehensive microbial variant detection and genome assembly improvement. *PLoS One.* 2014;9(11):e112963. doi:10.1371/journal.pone.0112963
32. Bankevich A, Nurk S, Antipov D, Gurevich AA, Dvorkin M, Kulikov AS, et al. SPAdes: a new genome assembly algorithm and its applications to single-cell sequencing. *J Comput Biol.* 2012;19(5):455-77. doi:10.1089/cmb.2012.0021
33. Seemann T. Prokka: rapid prokaryotic genome annotation. *Bioinformatics.* 2014;30(14):2068-9. doi:10.1093/bioinformatics/btu153
34. Chen L, Yang J, Yu J, Yao Z, Sun L, Shen Y, et al. VFDB: a reference database for bacterial virulence factors. *Nucleic Acids Res.* 2005;33(Database issue):D325-8. doi:10.1093/nar/gki008
35. McArthur AG, Waglechner N, Nizam F, Yan A, Azad MA, Baylay AJ, et al. The comprehensive antibiotic resistance database. *Antimicrob Agents Chemother.* 2013;57(7):3348-57. doi:10.1128/AAC.00419-13
36. Li J, Yao Y, Xu HH, Hao L, Deng Z, Rajakumar K, et al. SecReT6: a web-based resource for type VI secretion systems found in bacteria. *Environ Microbiol.* 2015;17(7):2196-202. doi:10.1111/1462-2920.12794
37. Camacho C, Coulouris G, Avagyan V, Ma N, Papadopoulos J, Bealer K, et al. BLAST+: architecture and applications. *BMC Bioinformatics.* 2009;10:421. doi:10.1186/1471-2105-10-421
38. Page AJ, Cummins CA, Hunt M, Wong VK, Reuter S, Holden MT, et al. Roary: rapid large-scale prokaryote pan genome analysis. *Bioinformatics.* 2015;31(22):3691-3. doi:10.1093/bioinformatics/btv421

39. Nguyen LT, Schmidt HA, von Haeseler A, Minh BQ. IQ-TREE: a fast and effective stochastic algorithm for estimating maximum-likelihood phylogenies. *Mol Biol Evol.* 2015;32(1):268-74. doi:10.1093/molbev/msu300
40. Kalyaanamoorthy S, Minh BQ, Wong TKF, von Haeseler A, Jermin LS. ModelFinder: fast model selection for accurate phylogenetic estimates. *Nat Methods.* 2017;14(6):587-9. doi:10.1038/nmeth.4285
41. Letunic I, Bork P. Interactive Tree Of Life (iTOL): an online tool for phylogenetic tree display and annotation. *Bioinformatics.* 2007;23(1):127-8. doi:10.1093/bioinformatics/btl529
